# Supplementary material for: Finding an Optimal Corneal Xenograft Using Comparative Analysis of Corneal Matrix Proteins Across Species
Source: PubMed Central journal article supplement (PMC6372616; doi:10.1038/s41598-018-38342-4), 2019-02-12
Supplement: 41598_2018_38342_MOESM1_ESM.pdf [file 41598_2018_38342_MOESM1_ESM.pdf]

## Finding an Optimal Corneal Xenograft: Comparative Analysis of Corneal Matrix Proteins Across Species.

Sharifi R<sup>1\*</sup>, Yang Y<sup>1,2\*</sup>, Adibnia Y<sup>1,3</sup>, Dohlman CH<sup>1</sup>, Chodosh J<sup>1</sup>, Gonzalez-Andrades M<sup>1, 4\*\*</sup>

**Supplementary Table 1.** Taxonomy ID of proteins examined for each species.

|            | Collagen alpha-1(I) chain (COL1A1)       | Collagen alpha-2(I) chain (COL1A2) | Collagen alpha-1(III) chain (COL1A3)                                                     | Collagen alpha-1(V) chain (COL1A5) | Collagen alpha-2(V) chain (COL5A2) | Collagen alpha-1(VI) chain (COL6A1)                | Collagen alpha-2(VI) chain (COL6A2)      | Collagen alpha-3(VI) chain (COL6A3)                                                      | Collagen alpha-1(XII) chain (COL12A1)                                    | Decorin                  | Lumican        | Keratocan      | Biglycan       | MAM domain-containing protein 2 (MCMDC2)                                                 | Prolargin      | Vimentin       |
|------------|------------------------------------------|------------------------------------|------------------------------------------------------------------------------------------|------------------------------------|------------------------------------|----------------------------------------------------|------------------------------------------|------------------------------------------------------------------------------------------|--------------------------------------------------------------------------|--------------------------|----------------|----------------|----------------|------------------------------------------------------------------------------------------|----------------|----------------|
| Human      | AAH36531.1                               | P08123.7                           | AAH28178.1                                                                               | NP_001839.2                        | P20908.3                           | AAH86874.1                                         | AAH65509.1                               | AAI50626.1                                                                               | AAI46869.1                                                               | AAA52301.                | AAA91639.1     | AAC16390.1     | AAA52287.1     | AAH16383.1                                                                               | NP_958505.1    | NP_003371.2    |
| Pig        | BAX02568.1                               | NP_001230584.1                     | NP_001230226.1                                                                           | BAE93249.1                         | NP_001014971.1                     | NP_001098759.1                                     | XP_013845689.1                           | BAE93252.1                                                                               |                                                                          | AAD33862.1<br>AAD23578.1 | NP_001230268.1 | XP_013853546.1 | Q9GKQ6.2       | NP_001231912.1                                                                           | XP_005656706.1 | P02543.2       |
| Rabbit     | XP_017204320.1                           | NP_001182597.1                     | XP_002712379.1                                                                           | XP_017194981.1                     | XP_017195888.1                     | XP_002712380.1                                     | XP_008265474.2*                          | XP_008249075.1                                                                           | Q28902.1                                                                 | AAB33083.1               | NP_001182609.1 | XP_002714430.1 | NP_001182620.1 | Isomers (XP_017197218.1, XP_002708240.1)                                                 | XP_002717628.1 | XP_002717466.1 |
| Guinea pig | Isomers (XP_013004992.1, XP_013004993.1) | XP_005006094.1, XP_003475044.2     | Isomers (XP_013012877.1, XP_013012878.1, XP_013012876.1, XP_013012875.1, XP_013012874.1) | XP_013000445.1*                    | XP_013008706.1                     | XP_003478750.1                                     | Isomers (XP_003463209.2, XP_005000633.1) | Isomers (XP_013012874.1, XP_013012875.1, XP_013012876.1, XP_013012877.1, XP_013012878.1) | XP_012997177.1<br>XP_003477950.2                                         | ACG50141.1               | XP_003475879.1 | XP_013014494.1 | XP_003462210.1 | XP_003472251.1                                                                           | XP_003474866.1 | NP_001166511.1 |
| Chick      | P02457.3                                 | NP_001073182.2                     | NP_990711.2                                                                              | NP_990438.1                        | NP_990121.2                        | XP_015144688.1<br>XP_004942453.1<br>XP_015144689.1 | NP_990679.1                              | AAA03201.1                                                                               | BAA00701.1                                                               | CAA45318.1               | NP_001263286.1 | AAC15506.1     |                | XP_003643063.1                                                                           | XP_418054.2    | NP_001041541.2 |
| Cat        | XP_003996748.1<br>XP_006940277.1         | XP_003982813.1                     | XP_003991010.1                                                                           | XP_011284013.1                     | XP_011287018.1                     | XP_003991011                                       | XP_011284015.1<br>XP_011284016.1         | XP_019694498.1*                                                                          | Isomers (XP_019686426.1, XP_019686427.1, XP_019686429.1, XP_006931912.1) | XP_003989160.1           | XP_003989158.1 | XP_006933986.1 | XP_019680037.1 | Isomers (XP_011286526.1, XP_011286527.1, XP_019671307.1, XP_019671309.1, XP_003995424.2) | XP_006942941.1 | XP_003988180.1 |

|           |                |                |                |                 |                 |                                          |                                          |                                                                                                          |                                                                   |            |                |                                |                |                                |                |                |
|-----------|----------------|----------------|----------------|-----------------|-----------------|------------------------------------------|------------------------------------------|----------------------------------------------------------------------------------------------------------|-------------------------------------------------------------------|------------|----------------|--------------------------------|----------------|--------------------------------|----------------|----------------|
| Dog       | NP_001003090.1 | NP_001003187.1 | XP_851009.1    | NP_001003090.1  | XP_013972345.1  | XP_005640450.1                           | XP_013965345.1                           | NP_001096685.1                                                                                           | XP_013973586.1<br>XP_005627592.1<br>XP_539002.2<br>XP_005627593.1 | AAB51245.1 | XP_539716.1    | XP_005629277.1                 | AAB51244.1     | XP_851100.1,<br>XP_005615934.1 | XP_005640817.1 | NP_001273952.1 |
| Rat       | P02454.5       | P02466.3       | AAH87039.1     | XP_215375.5     | NP_604447.1     | NP_445940.1                              | AAH89923.1                               | Isomers (EDL97135.1, EDL92061.1, EDL92062.1, EDL92064.1, EDL92065.1)                                     | AAB07870.1                                                        | AAH83750.1 | AAH61878.1     | NP_001101557.1                 | AAA58797.1     | EDM13018.1                     | NP_445837.1    | NP_112402.1    |
| Mouse     | P11087.4       | Q01149.2       | AAH28248.1     | NP_034063.1     | NP_056549.2     | NP_031763.2                              | EDL31842.1                               | AAC23667.1                                                                                               | NP_001277237.1                                                    | P28654.1   | EDL21630.1     | AAC61257.1                     | EDL29897.1     | NP_777282.1                    | NP_473418.3    | NP_035831.2    |
| Cow       | P02453.3       | NP_776945.1    | P04258.1       | NP_001137337.1  | AFR46612.1      | Isomers (XP_010800138.1, XP_015317726.1) | NP_001068594.1                           | Isomers (DAA30924.1, DAA30925.1, DAA30926.1, DAA30927.1)                                                 | NP_001193426.1                                                    | P21793.2   | Q05443.1       | O62702.2                       | AAI18461.1     | XP_015320003.1                 | NP_776859.1    | NP_776394.2    |
| Sheep     | XP_014954201.1 | XP_004007775.1 | XP_004004563.1 | XP_004003436.1* | XP_014949583.1* | XP_004004562.1                           | XP_014947255.1*                          | AAF79924.1                                                                                               | Isomers (XP_014952772.1, XP_012037779.1, XP_014952773.1)          | Q9TTE2.1   | XP_012029466.1 | XP_012029465.1                 | NP_001009201.1 | XP_004004372.1, XP_011978822.1 | XP_004013593.1 | ABP48145.1     |
| Goat      | XP_017900444.1 | XP_005678993.1 | XP_005675926.1 | XP_017907809.1  | XP_017911687.1  | XP_005675925.2                           | Isomers (XP_017907820.1, XP_017907828.1) | Isomers (XP_017896193.1, XP_017896201.1, XP_017896208.1, XP_017896216.1, XP_013818488.2, XP_017896230.1) | Isomers (XP_017908356.1, XP_017908357.1, XP_017908359.1)          | AEA36044.1 | XP_017903107.1 | XP_005679867.1                 | XP_01790688.1  | XP_005683777.2                 | XP_005690429.1 | XP_017912644.1 |
| Horse     | XP_014592408.1 | NP_001075233.1 | AAD13114.1     | XP_001488401.2  | XP_014591730.1* | XP_001501867.1                           | XP_014591965.1                           | XP_014595871.1*                                                                                          | BAB64260.1                                                        | AAB92652.1 | ABC69292.1     | XP_014592227.1, XP_001492790.2 | AAB88305.1     | XP_001489371.1                 | XP_001915309.1 | NP_001230074.1 |
| Zebrafish | AAH63249.1     | AAH71278.1     | NA             | XP_00930444.1   | ADG36303.1      | NP_001139254.1                           | AAI34052.1                               | Isomers (XP_017213295.1, XP_017213296.1, XP_017213297.1, XP_017213298.1)                                 | CAQ03443.1                                                        | AAH44206.1 | ACU68929.1     | AAI15059.1                     | AAH74062.1     | NP_001123869.1                 | XP_001923590.1 | AAC98491.1     |
